# Supplementary material
Source: Springer Nature journal article supplement (https://www.springermedizin.de/resource/supplementary/12885_2014_4652_MOESM6_ESM.pdf/9466956)

Figure 2.

A.

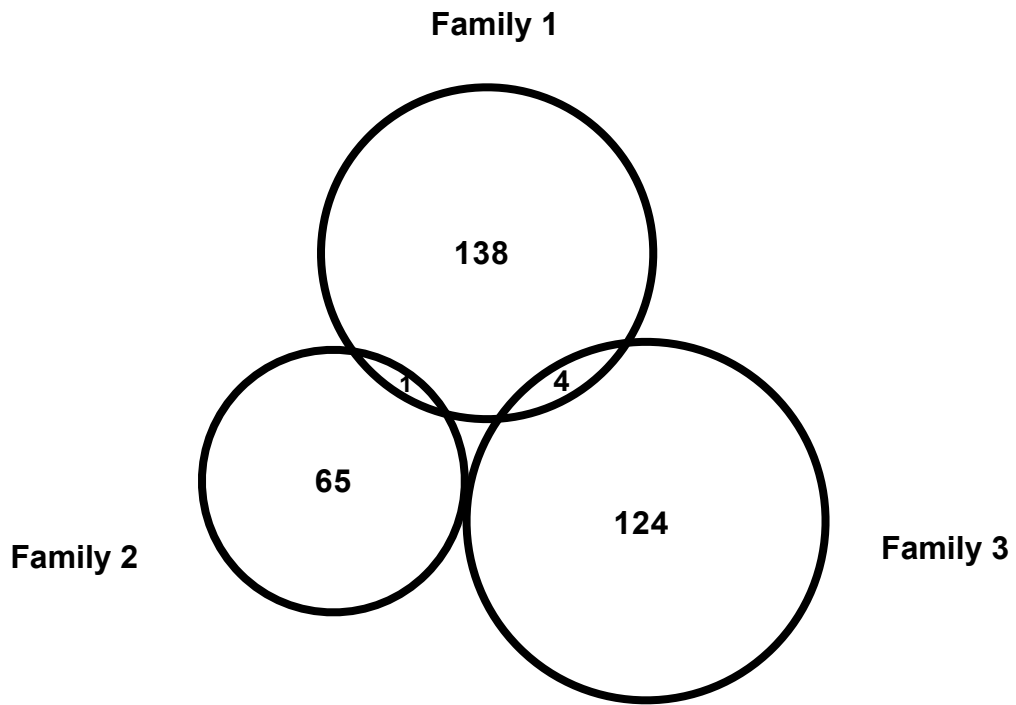

B.

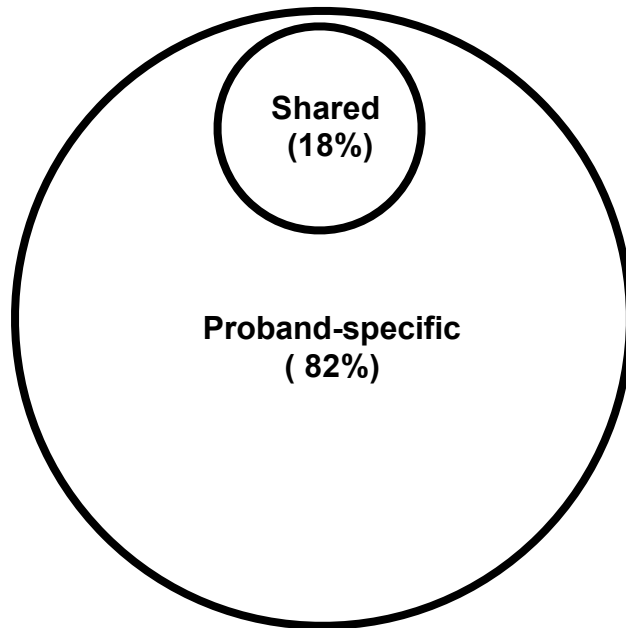

Supplement: MOESM6 [file 9466956]
